# Supplementary material for: ABA and Melatonin: Players on the Same Field?
Source: Preprints.org preprint supplement (doi:10.20944/preprints202410.1525.v1), 2024-10-21
Supplement: Supplementary file 1 [file supplementary]

Supplementary Materials

**ABA and Melatonin:** **Players on the Same Field?**

Ivan Bychkov, Natalia Kudryakova*, Elena S. Pojidaeva, Anastasia Doroshenko, Victoria Shitikova, Victor Kusnetsov

К.А. Timiryazev Institute of Plant Physiology RAS, 35 Botanicheskaya St., Moscow, 127276, Russia*

**Table S1**. List of primers used for RT-qPCR.

| **Gene name** | **Locus** | **Forward primer (5′->3′)** | **Reverse primer (5′->3′)** |
| --- | --- | --- | --- |
| *SNAT1* | AT1G32070 | TAC GCA ACT TGT GGA ACC ACC T | ATC ATA AAC ATC AAT CTC ACC ACC A |
| *ASMT* | AT4G35160 | GCAAAGAAGCGGTCCCTCCAA | GTCCGTTCTTTGCCTGTGCTTGT |
| *COMT* | AT5G54160 | GGA GTG ACG AAC ATT GCG T | TCT CGG TTC GTT CTT TGC CT |
| *T5H* | AT3G53305 | GCC GTA GAA GCT GTC CTG GTA | AGT GCT GAT GGA AGA GTT GGT ATG |
| *TDC* | AT2G20340 | CCT GGA GTA ACG CAT TGG CA | AGT GTT GCT GGG TTC TTG GG |
| *CAND2* | AT3G05010 | ATG CGA GTG CTC AGC GAG AT | TTA TTC CCA ATC AGC GTC GAA GAA T |
| *GPA1* | AT2G26300 | CGT TTG CGA GTG GTT CAG AGA T | CCA AAG CCG TCG TCC TGT AGA T |
| *M2H* | AT3G60290 | AGG TTC TTT GAC TTA CCT GCC G | GTA GCA GGG AGG ATT GGA AGG |
| *M3H* | AT1G17020 | CAG GAA AGA AGC CGA CAT GGA | TAG GAG GAA CGG TCG TGA TCG |
| *ELIP2* | AT4G14690 | ACG GGA GAC TAG CAA TGG TT | CCT AGA AAC CAC CCG ACA CC |
| *PSBS* | AT1G44575 | TTG CTT GGT GAG GCG TTG AC | GGC TCT GCT TCG TAA ATC GG |
| *AOX1a* | AT3G22370 | GAT TGG AGG TAT GAG ATT CGC | CGG TGG ATT CGT TCT CTG TTT |
| *MAPK6* | AT2G43790 | ATC TCC ATC AAA TCA TTC GGT CAA A | CAG TTT GCG TTC AGG AGG AGA TTA C |
| *ABI1* | AT4G26080 | GAA GAA GCG TGT GAG ATG GCA | TCC CTT CCT TTC TCC GCT CA |
| *ABI2* | AT5G57050 | TGG TGT TCT CGC AAT GTC AAG | CAA ATC GCA CAC TTC TTC GT |
| *ABI3* | AT3G24650 | TGC CTG CTC CAA ACT ATC CG | TTA TAC TGC GAG GTT GGC GG |
| *ABI4* | AT2G40220 | CAA GGA GGA AGT GGG TGT AAT AAT AA | ATC CAG ACC CAT AGA ACA TAC CG |
| *ABI5* | AT2G36270 | TGG AGA GGA AGA GGA AGC AA | GTT TGA AGT CAA GGG CAC AA |
| *NCED4* | AT4G19170 | CAC CGA AAC TCC GAC CAG AAA | CGG AAG GAC GTG AAG GTG GAT |
| *CYP707a1* | AT4G19230 | CGT GTC CTG GAA ATG AAT TAG CC | GCA CAA TGG GCA GTC CGT TT |
| *ABA3* | AT1G16540 | ACT GAG ACC GTG CTA CAA GGC T | ATC AAT CAA GAC CAT CCA CCG |
| *UBQ10* | At4G05320 | GCG TCT TCG TGG TGG TTT CTA A | GAA AGA GAT AAC AGG AAC GGA AAC A |

### Sequence data from this article can be found in the National Center for Biotechnology Information <https://www.ncbi.nlm.nih.gov/>

###
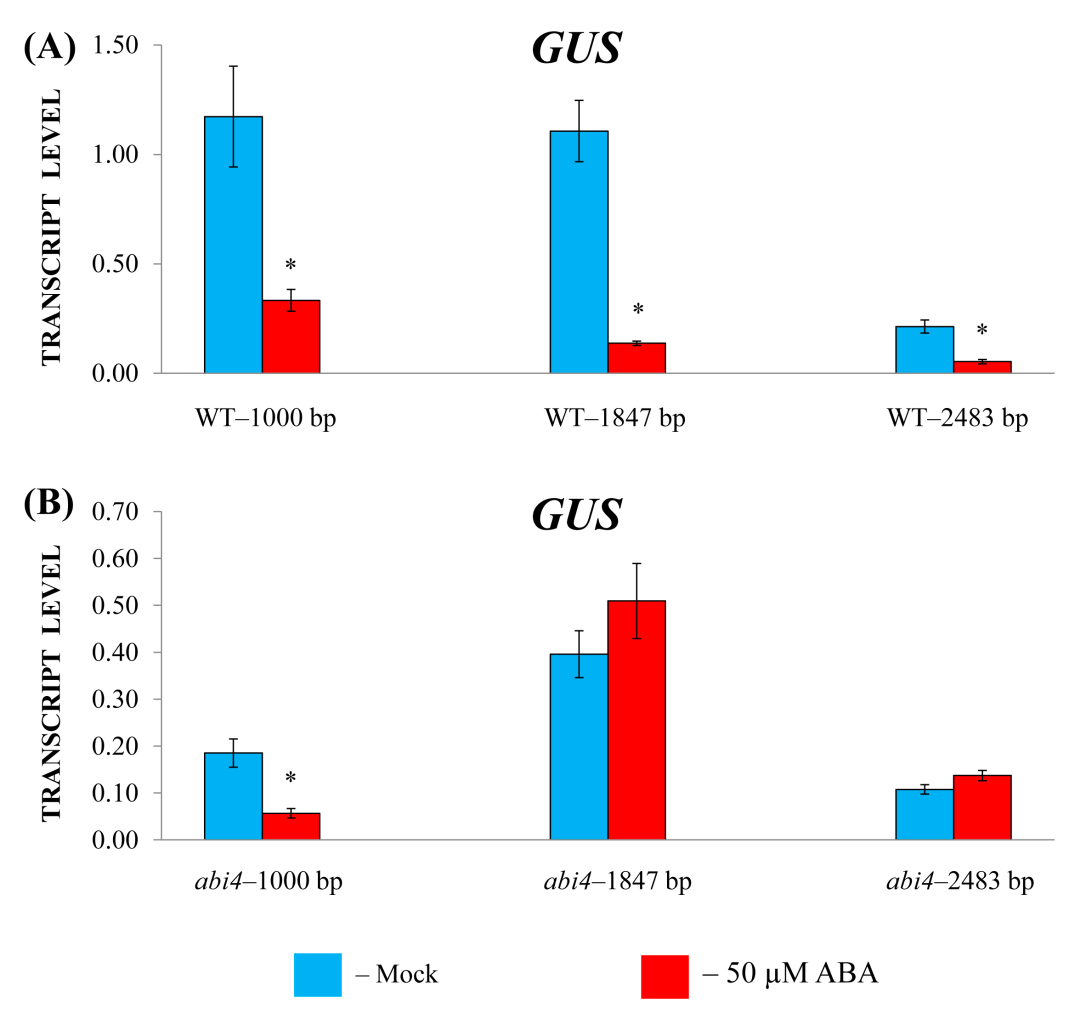


**Figure S1**. Expression of the reporter β-glucuronidase (*GUS*) gene in five-week-old leaves *Arabidopsis thaliana* exposed for 6 h to mock solution (A) or 50 μM ABA (B).
